# Supplementary material for: Anti-Inflammatory, Analgesic and Antioxidant Potential of New (2S,3S)-2-(4-isopropylbenzyl)-2-methyl-4-nitro-3-phenylbutanals and Their Corresponding Carboxylic Acids through In Vitro, In Silico and In Vivo Studies
Source: MDPI journal article supplement (doi:10.3390/molecules27134068), 2022-06-24
Supplement: s1 [file s1]

## Supporting Information

### Chemical and drugs

Cyclooxygenase (COX-2) was acquired from human recombinant (Catalog No:C0858) and lipooxygenase (5-LOX) from Human Recombinant (Catalog No: 437996), Enzyme substrate including arachidonic acid (CAT No: 150384) and lineolic acid (CAS No: 60-33-3), Indicator and co-factor substances in this study like *N*, *N*′, *N*′-tetramethyl-p-phenylenediamine dihydrochloride (TMPD) CAS No: 637-01-4, glutathione (CAS No. 70-18-8) and hematin (CAS No. 15489-90-4), Carrageenan (CAS No. 9064-67-7), Nalaxon, Arachidonic acid (CAS No. 506-32-1), ABTS (CAS No. 30931-67-0, Sigma Aldrich USA), DPPH (CAS No. 1898-66-4, Sigma Aldrich Chemie GmbH USA), K<sub>2</sub>S<sub>2</sub>O<sub>4</sub> (Riedel-deHaen Germany), and gallic acid (CAS No. 149-91-7, GmbH USA). these all were purchased from Sigma Aldrich Germany. Buffer solution containing (KH<sub>2</sub>PO<sub>4</sub> & K<sub>2</sub>HPO<sub>4</sub>), was of best quality with high purity. Celecoxib, Montelukast was purchased from Pfizer Pharmaceutical and Libra (Pvt.) limited. Tramadol, Diclofenac was purchased from Alliance Pharmaceutical Pakistan.

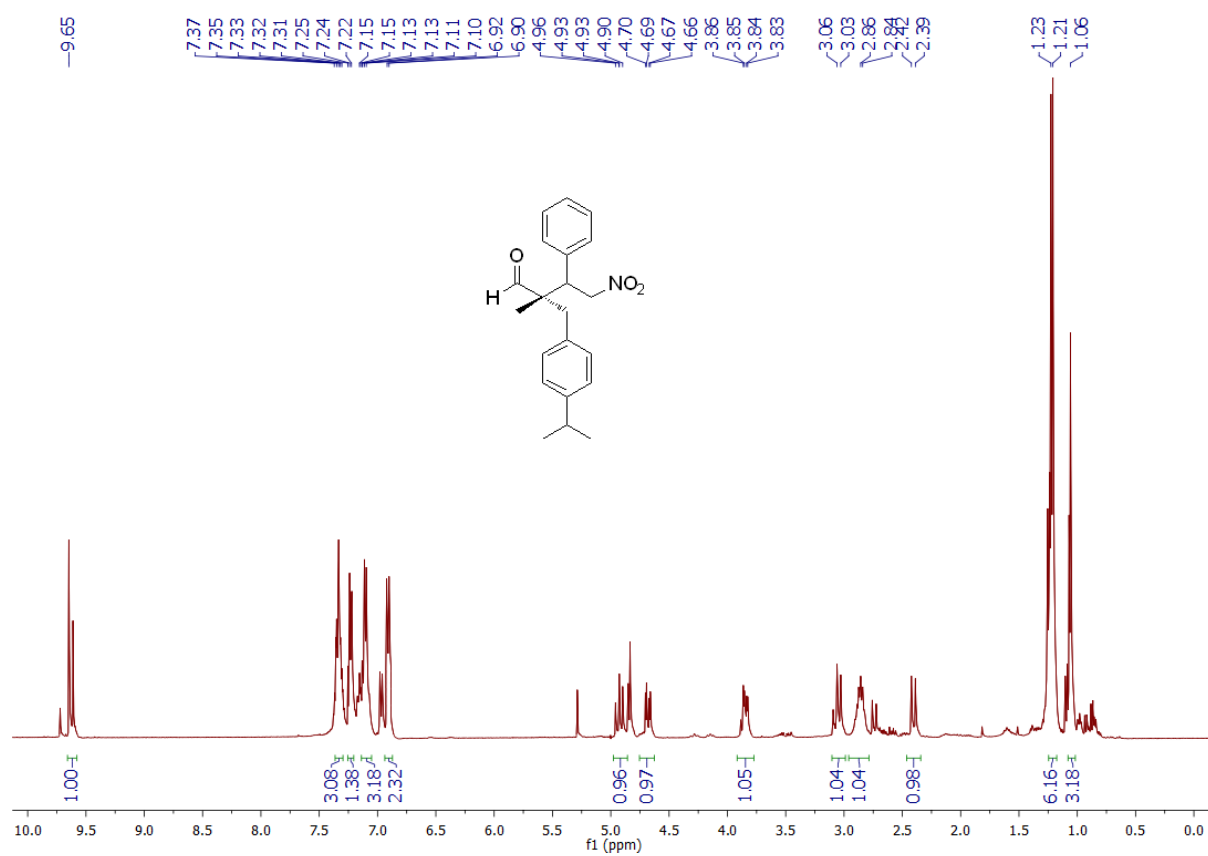

**Figure S1.** <sup>1</sup>H NMR spectrum of compound **FM1**.

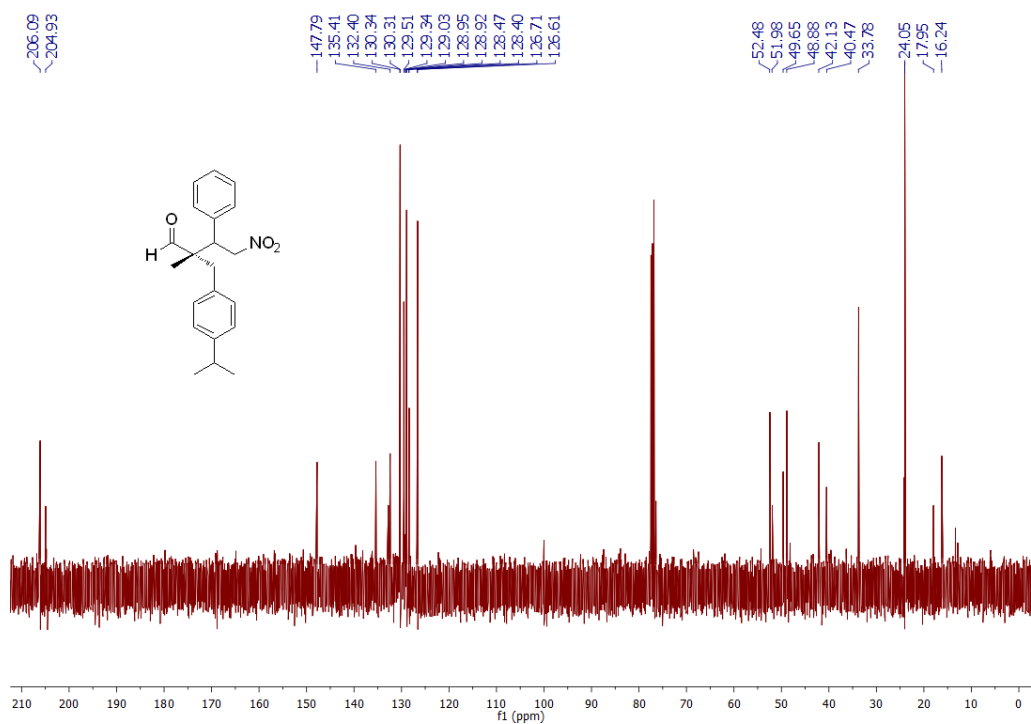

**Figure S2.** <sup>13</sup>C NMR spectrum of compound **FM1**.

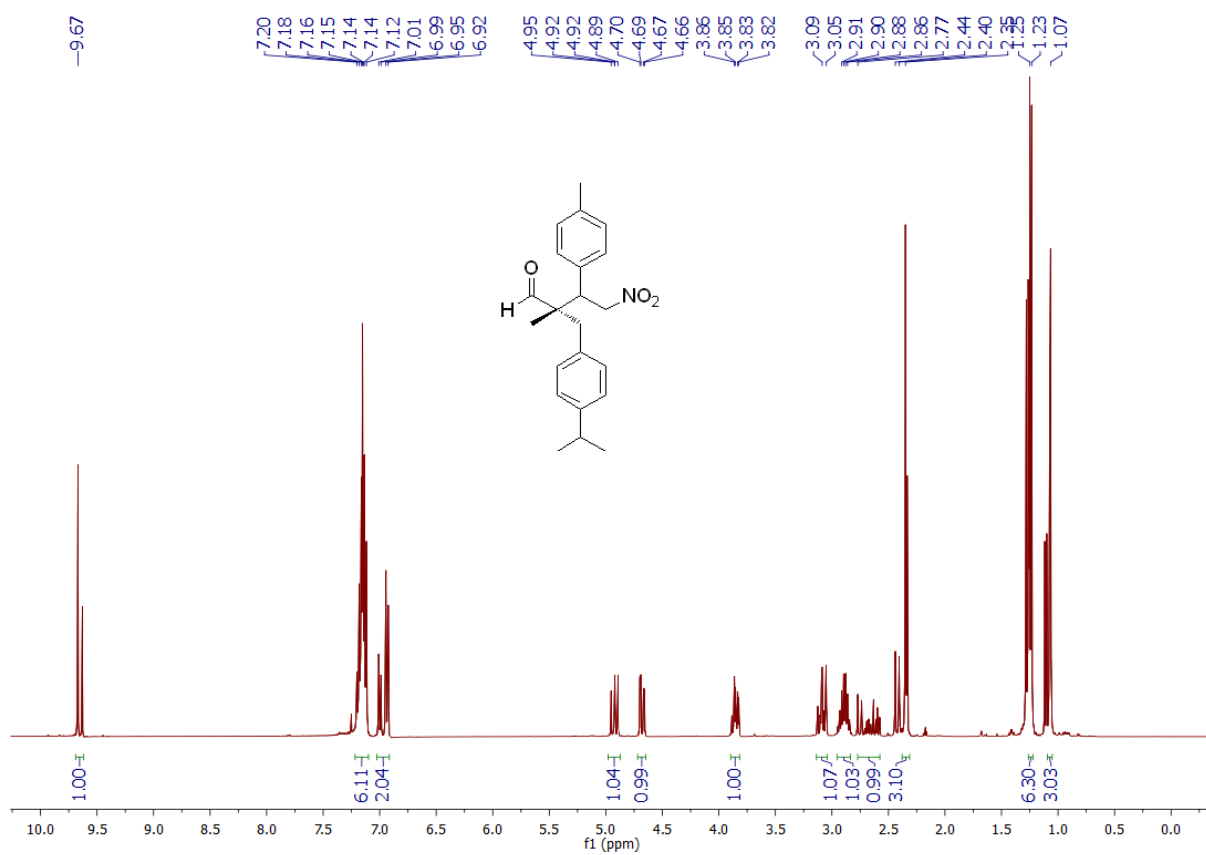

**Figure S3.** <sup>1</sup>H NMR spectrum of compound **FM3**.

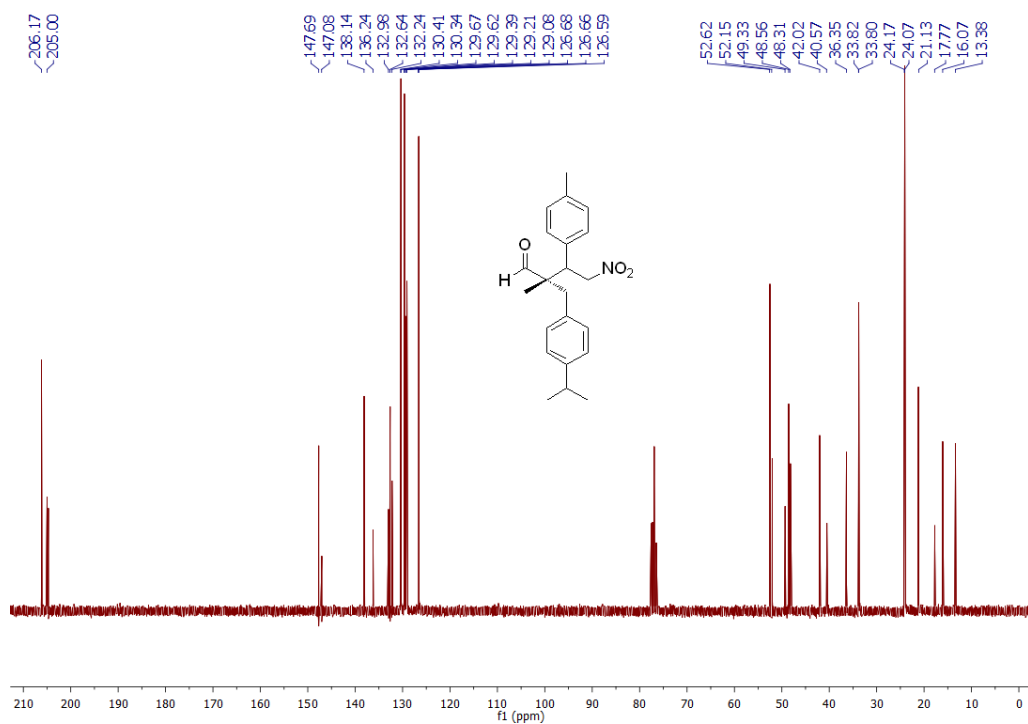

**Figure S4.** <sup>13</sup>C NMR spectrum of compound **FM3**.

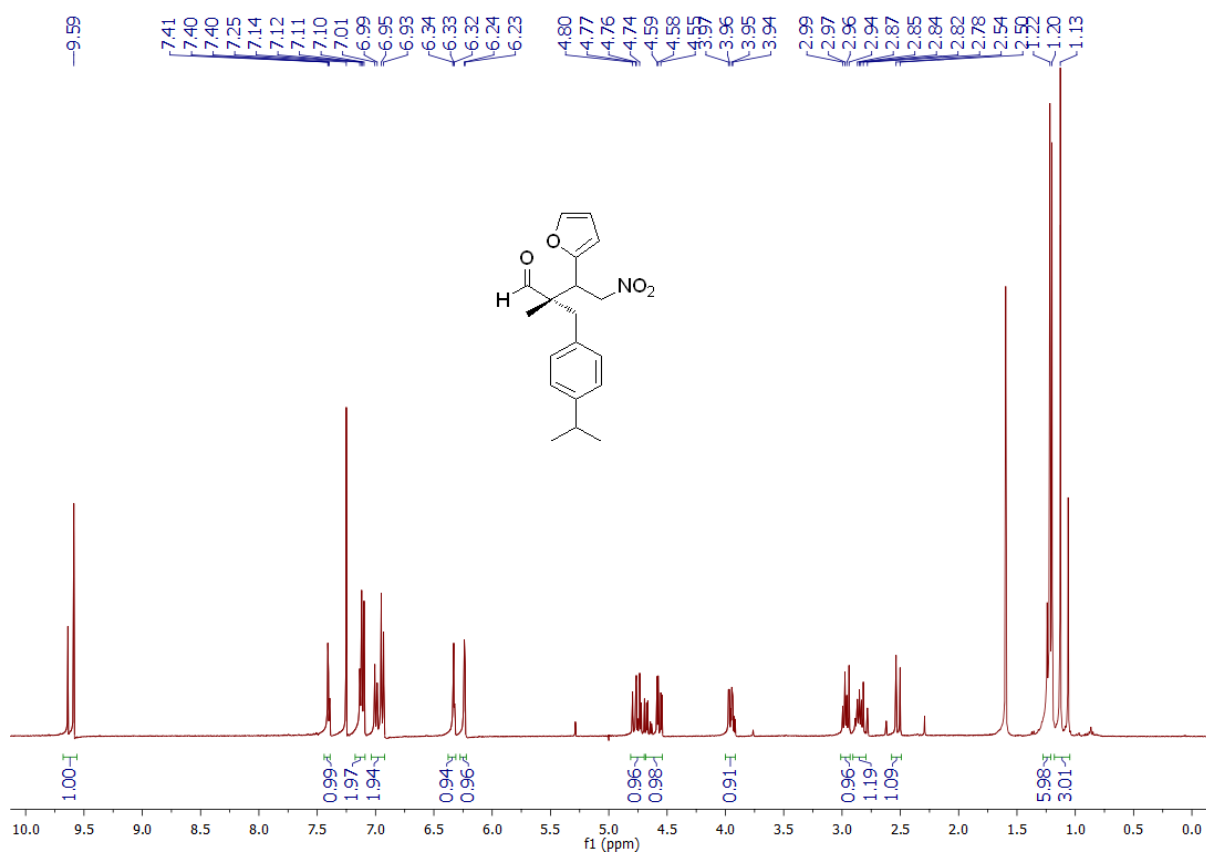

**Figure S5.** <sup>1</sup>H NMR spectrum of compound **FM6**.

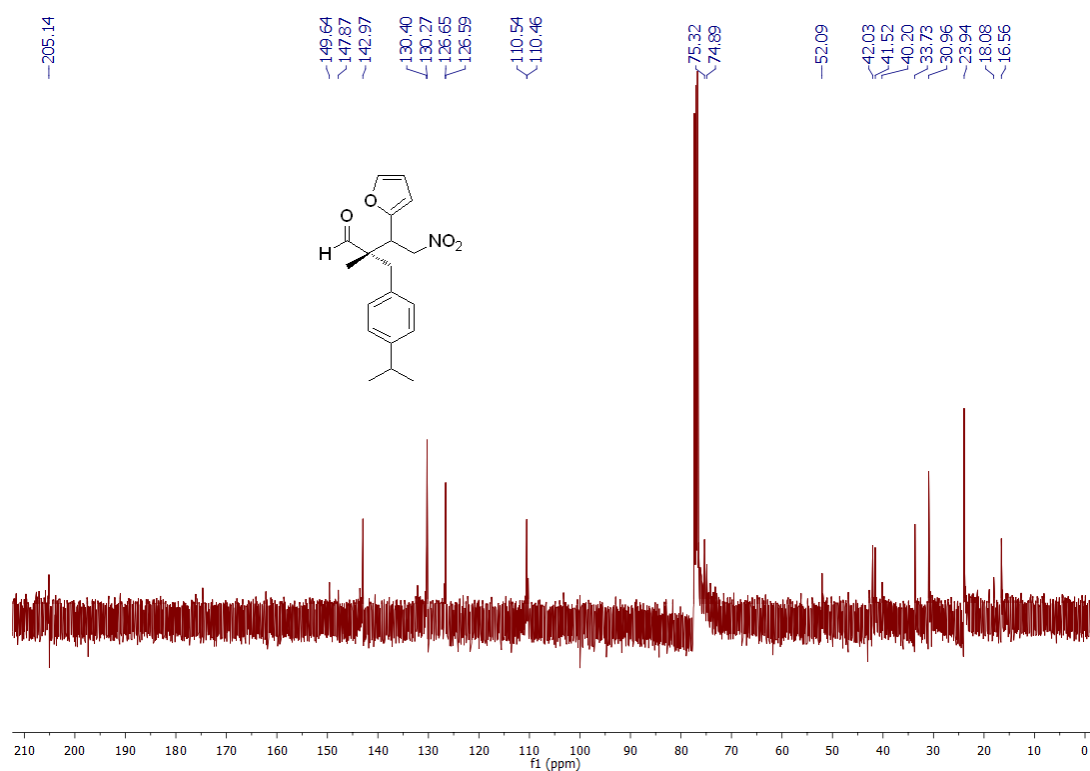

**Figure S6.** <sup>13</sup>C NMR spectrum of compound FM6.

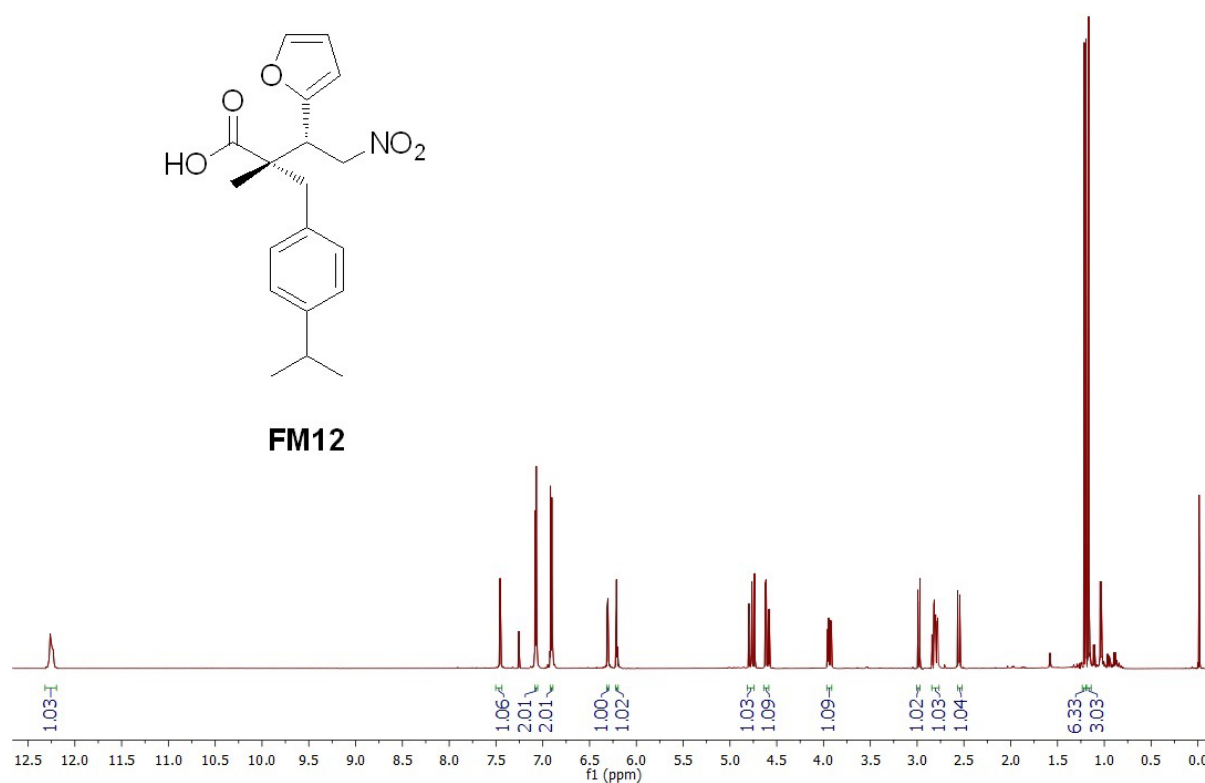

**Figure S7.** <sup>1</sup>H NMR spectrum of compound FM12.
